# Supplementary material
Source: PubMed Central journal article supplement (PMC3245686)
Supplement: NIHMS336853-supplement-1.pdf [file NIHMS336853-supplement-1.pdf]

**LONG-TERM EFFECTS OF CHLORTHALIDONE VS HYDROCHLOROTHIAZIDE ON  
ELECTROCARDIOGRAPHIC LEFT VENTRICULAR HYPERTROPHY IN THE MULTIPLE RISK FACTOR  
INTERVENTION TRIAL**

Michael E. Ernst, PharmD; James D. Neaton, PhD; Richard H. Grimm, Jr, MD, PhD; Gary Collins, MS; William Thomas, PhD; Elsayed Z. Soliman, MD, MSc, MS; Ronald J. Prineas, MD, PhD; for the MRFIT Research Group

**Online Supplement**

**S1.** Logistic regression of being on chlorthalidone at month 48 on selected baseline variables, adjusted for SI hypertensive participants on chlorthalidone or hydrochlorothiazide at month 48.

| <b>Baseline Variables</b>                        | <b>Odds Ratio (95% CI)</b> | <b>P-value</b> |
|--------------------------------------------------|----------------------------|----------------|
| Age (5 year difference)                          | 0.91 (0.84, 0.99)          | .03            |
| Black race                                       | 1.04 (0.76, 1.43)          | .82            |
| Body mass index (4 kg/m <sup>2</sup> difference) | 1.01 (0.90, 1.12)          | .91            |
| Smoker                                           | 0.92 (0.75, 1.14)          | .45            |
| Diastolic blood pressure (25 mmHg difference)    | 1.25 (0.80, 1.95)          | .34            |
| Systolic blood pressure (50 mmHg difference)     | 1.28 (0.80, 2.06)          | .30            |
| On antihypertensive meds                         | 0.76 (0.61, 0.95)          | .02            |
| Glucose (20 mg/dl difference)                    | 1.05 (0.92, 1.19)          | .48            |
| Creatinine (0.2 mg/dl difference)                | 0.96 (0.85, 1.09)          | .54            |
| Potassium (mg/dl)                                | 0.85 (0.68, 1.05)          | .12            |
| Proteinuria (+1 or greater)                      | 0.71 (0.46, 1.11)          | .14            |
| Uric acid (mg/dl)                                | 1.04 (0.97, 1.12)          | .25            |
| Drinks per week (7 drink difference)             | 1.02 (0.96, 1.07)          | .59            |
| Serum cholesterol                                | 0.88 (0.76, 1.02)          | .08            |
| HDL cholesterol                                  | 1.05 (0.96, 1.15)          | .25            |
| LDL cholesterol                                  | 0.99 (0.86, 1.15)          | .93            |
| Triglycerides                                    | 1.05 (0.92, 1.20)          | .46            |

**S2.** Mean differences in blood pressure, potassium, and electrocardiographic LVH through 48 and 84 months, adjusted for propensity score with stratification by site for SI participants who were hypertensive at baseline.

| Variable                                                              | Through 48 Months |              |         | Through 84 Months |              |         |
|-----------------------------------------------------------------------|-------------------|--------------|---------|-------------------|--------------|---------|
|                                                                       | C-H difference*   | 95% CI       | P-value | C-H difference*   | 95% CI       | P-value |
| Systolic blood pressure (mm Hg)                                       | -1.7              | -2.3, -1.2   | < .001  | -1.8              | -2.2, -1.4   | < .001  |
| Diastolic blood pressure (mm Hg)                                      | -0.7              | -1.1, -0.4   | < .001  | -0.8              | -1.0, -0.5   | < .001  |
| Potassium (mmol/L)                                                    | -0.23             | -0.25, -0.21 | <.001   | -0.23             | -0.25, -0.22 | <.001   |
| <b>Electrocardiographic Measurement</b>                               |                   |              |         |                   |              |         |
| Absolute maximum of R amplitude V <sub>5,6</sub> (μV)                 | -24.8             | -38.3, -11.2 | < .001  | -8.2              | -17.8, 1.4   | .09     |
| Absolute S amplitude V <sub>1</sub> (μV)                              | -12.7             | -25.1, -0.3  | .05     | -16.2             | -25.5, -6.9  | < .001  |
| R amplitude aVL (μV)                                                  | 4.3               | -2.2, 10.8   | .20     | 3.3               | -1.4, 8.0    | .17     |
| Absolute S amplitude V <sub>3</sub> (μV)                              | 0.1               | -10.9, 11.2  | .98     | -5.1              | -12.9, 2.8   | .21     |
| QRS duration (ms)                                                     | 1.0               | 0.6, 1.3     | < .001  | 0.9               | 0.6, 1.1     | < .001  |
| <b>Criteria for Electrocardiographic Left Ventricular Hypertrophy</b> |                   |              |         |                   |              |         |
| Sokolow-Lyon (μV)                                                     | -38.8             | -57.9, -19.7 | < .001  | -26.8             | -40.6, -12.9 | < .001  |

|                                                     |      |            |      |      |            |      |
|-----------------------------------------------------|------|------------|------|------|------------|------|
| Cornell voltage ( $\mu\text{V}$ )                   | 3.7  | -8.8, 16.3 | .56  | -1.3 | -10.3, 7.8 | .78  |
| Cornell voltage product ( $\mu\text{V}/\text{ms}$ ) | 1.7  | 0.5, 3.0   | .008 | 1.3  | 0.3, 2.2   | .008 |
| Left ventricular mass (gm)                          | -0.6 | -1.0, -0.1 | .02  | -0.5 | -0.8, -0.2 | .003 |

\* Adjusted for baseline level and propensity score

Formulas:

Sokolow-Lyon voltage ( $\mu\text{V}$ ) =  $|SV_1| + \max |RV_5/V_6|$

Cornell voltage ( $\mu\text{V}$ ) =  $SV_3 + RaVL$

Cornell voltage product ( $\mu\text{V}/\text{ms}$ ) = Cornell voltage \* QRS duration

Left ventricular mass (white men):  $0.023 \text{ Cornell voltage} + 0.010 \text{ Sokolow-Lyon} + 1.32 \text{ weight} + 10.6$

Left ventricular mass (black men):  $0.0018 \text{ Cornell voltage} + 0.51 \text{ } JV_5 + 1.45 \text{ weight} + 17.4$
